# Supplementary material
Source: PubMed Central journal article supplement (PMC8295899)
Supplement: jamapsychiatry-e211471-s001.pdf [file jamapsychiatry-e211471-s001.pdf]

## Supplementary Online Content

Hjorthøj C, Posselt CM, Nordentoft M. Development over time of the population-attributable risk fraction for cannabis use disorder in schizophrenia. *JAMA Psychiatry*. Published online July 21, 2021. doi:10.1001/jamapsychiatry.2021.1471

**eTable.** All Parameter Estimates From the Regression Models for 1972, 2000, and 2016

This supplementary material has been provided by the authors to give readers additional information about their work.

**eTable.** All Parameter Estimates From the Regression Models for 1972, 2000, and 2016

|                                     | 1972                         | 2000                         | 2016                         |
|-------------------------------------|------------------------------|------------------------------|------------------------------|
| Cannabis use disorder               | 2.56 (1.60-4.09), p<0.001    | 4.45 (3.34-5.93), p<0.001    | 4.31 (3.56-5.24), p<0.001    |
| Alcohol use disorder                | 0.55 (0.38-0.81), p=0.002    | 0.74 (0.58-0.93), p=0.01     | 2.78 (2.08-3.71), p<0.001    |
| Other substance use disorder        | 1.02 (0.70-1.48), p=0.91     | 2.34 (1.93-2.85), p<0.001    | 2.32 (1.96-2.76), p<0.001    |
| Other psychiatric disorders         | 53.17 (45.43-62.23), p<0.001 | 63.81 (55.80-72.96), p<0.001 | 24.00 (20.76-27.74), p<0.001 |
| Parental schizophrenia              | 3.41 (0.80-14.56), p=0.10    | 2.61 (1.83-3.70), p<0.001    | 1.86 (1.32-2.61), p<0.001    |
| Other parental psychiatric disorder | 1.04 (0.65-1.66), p=0.88     | 1.21 (1.04-1.41), p=0.02     | 1.31 (1.15-1.50), p<0.001    |
| Parental substance use disorder     | 1.40 (0.74-2.65), p=0.30     | 1.07 (0.89-1.29), p=0.45     | 1.01 (0.85-1.20), p=0.89     |
|                                     |                              |                              |                              |
| Parental level of education         |                              |                              |                              |
| Primary / lower secondary           | 0.97 (0.59-1.61), p=0.91     | 1.03 (0.87-1.22)             | 0.96 (0.81-1.13), p=0.62     |
| Upper secondary                     | 1 (ref.)                     | 1 (ref.)                     | 1 (ref.)                     |
| Short-cycle tertiary                | 1.24 (0.29-5.27), p=0.77     | 1.04 (0.70-1.54), p=0.86     | 0.90 (0.68-1.18), p=0.44     |
| Bachelor's or equivalent            | 0.93 (0.35-2.43), p=0.88     | 1.46 (1.20-1.77), p<0.001    | 0.85 (0.72-1.00), p=0.05     |
| Master's or equivalent or higher    | 0.98 (0.29-3.25), p=0.97     | 1.50 (1.14-1.98), p=0.004    | 1.18 (0.96-1.46), p=0.12     |
| Unknown                             | 0.47 (0.29-0.76), p=0.002    | 0.94 (0.75-1.18), p=0.58     | 1.77 (1.38-2.27), p<0.001    |
|                                     |                              |                              |                              |
| Foreign-born                        | 0.75 (0.53-1.08), p=0.13     | 2.46 (2.05-2.96), p<0.001    | 1.72 (1.41-2.10), p<0.001    |
| Female sex                          | 0.70 (0.61-0.80), p<0.001    | 0.58 (0.51-0.65), p<0.001    | 0.76 (0.68-0.85), p<0.001    |
